# Supplementary material
Source: Royal Society of Chemistry journal article supplement (doi:10.1039/d6ja00013d)
Supplement: d6ja00013d1.pdf [file d6ja00013d1.pdf]

## Electronic Supplementary Material of

### Comparison of ionic, atomic and molecular emissions in underwater laser-induced breakdown spectroscopy for quantitative analysis of Ca and Sr

Ziwen Jia<sup>a</sup>, Ye Tian<sup>b,c,\*</sup>, Lianfu Li<sup>a</sup>, Chenyang Xue<sup>a</sup>, Jinjia Guo<sup>b,c</sup>, Yuan Lu<sup>b,c</sup>, Xin Zhang<sup>a</sup>, Ronger Zheng<sup>b,c</sup>

<sup>a</sup> Laoshan Laboratory, Qingdao 266237, China

<sup>b</sup> College of Physics and Optoelectronic Engineering, Ocean University of China, Qingdao 266100, China

<sup>c</sup> Engineering Research Center of Advanced Marine Physical Instruments and Equipment of Education Ministry, Ocean University of China, Qingdao 266100, China

\* Corresponding author: ytian@ouc.edu.cn

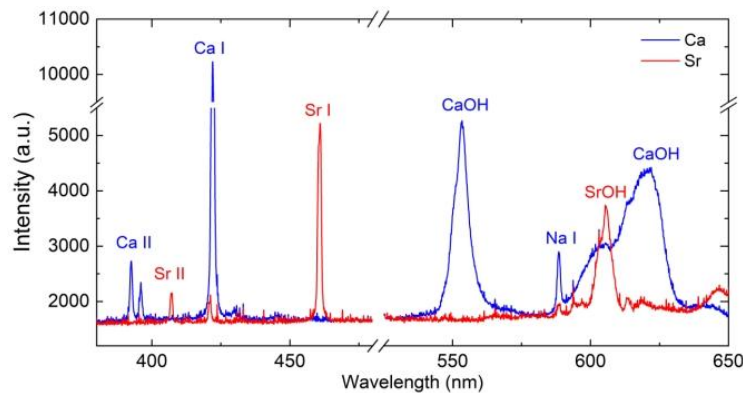

Figure S1. Underwater LIBS spectra obtained from water solutions containing only Ca and only Sr. The spectra were acquired at a delay of 200 ns with a gate width of 2  $\mu$ s. Each spectrum was an average of 100 laser shots.

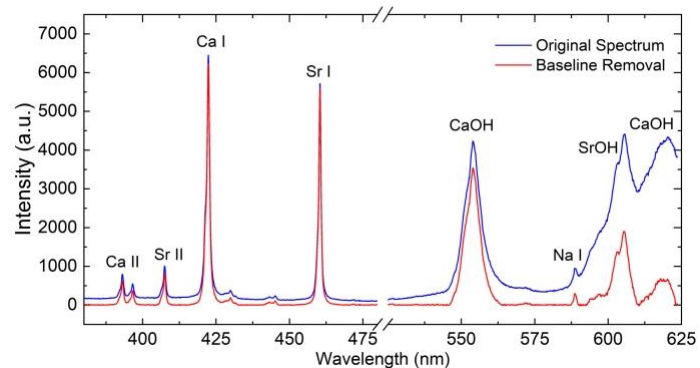

Figure S2. The raw underwater LIBS spectrum of Ca and Sr (blue) and the spectrum after baseline removal (red).

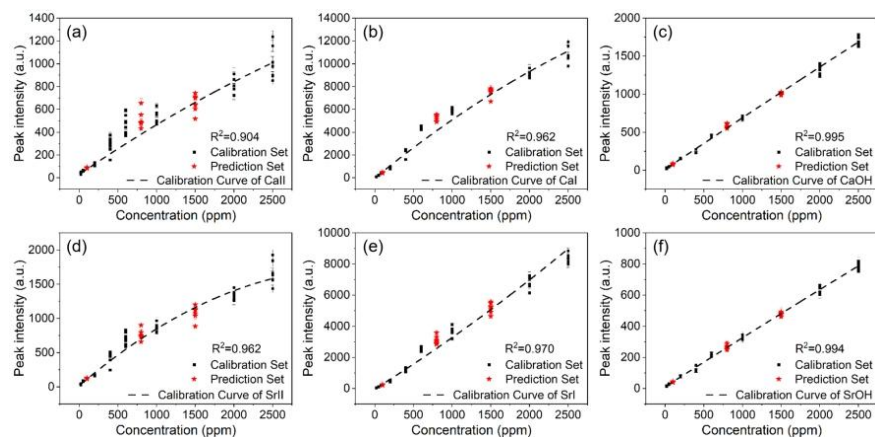

Figure S3. Calibration curves of (a) Ca II 393.4 nm, (b) Ca I 422.7 nm, (c) CaOH 554 nm, (d) Sr II 407.8 nm, (e) Sr I 460.7 nm, and (f) SrOH 605 nm obtained from the spectra of different ambient pressures from 0.1 to 50 MPa. The calibration curves were fitted with a quadratic regression. The spectra were acquired at a delay of 200 ns with a gate width of 100 ns.

Table S1. Relative emission contribution of OH 309 nm, Ca II 393.4 nm, Sr II 407.8 nm, Ca I 422.7 nm, Sr I 460.7 nm, CaOH 554 nm, and SrOH 605 nm at different delay time. Data in this table correspond to Figure 3 in the manuscript.

| Species<br>Delay<br>Time (ns) | OH   | Ca II | Sr II | Ca I | Sr I | CaOH | SrOH |
|-------------------------------|------|-------|-------|------|------|------|------|
| 20                            | 46.3 | 23.3  | 14.6  | 15.7 | /    | /    | /    |
| 50                            | 34.1 | 17.6  | 9.9   | 12   | 5.6  | 20.8 | /    |
| 70                            | 29.2 | 14.2  | 7.9   | 12   | 4.6  | 17.1 | 14.9 |
| 100                           | 28.2 | 12.1  | 7     | 13   | 4.9  | 17.5 | 17.4 |
| 120                           | 26.7 | 10.6  | 6.2   | 13.4 | 5.2  | 18.3 | 19.6 |
| 150                           | 26   | 9.5   | 6.1   | 14.2 | 5.6  | 18   | 20.6 |
| 170                           | 25.6 | 8.8   | 5.5   | 13.9 | 5.5  | 19.1 | 21.6 |
| 200                           | 22.5 | 6.9   | 4.7   | 15   | 6.3  | 20.1 | 24.4 |
| 300                           | 16.7 | 4.7   | 3.7   | 15.6 | 7.9  | 22.9 | 28.6 |
| 400                           | 15.3 | 3.4   | 2.8   | 14.5 | 8.3  | 24.4 | 31.3 |
| 500                           | 12.3 | 3     | 2.6   | 14   | 8.9  | 26.3 | 32.9 |
| 600                           | 11.9 | 2.7   | 2.1   | 12   | 8.4  | 28   | 34.9 |
| 700                           | 10.4 | /     | /     | 13   | 8.9  | 29.6 | 38.1 |
| 800                           | 10.4 | /     | /     | 12.2 | 9.8  | 29.5 | 38.1 |
| 900                           | 11.1 | /     | /     | 10.7 | 8.4  | 29.7 | 40.1 |
| 1000                          | 6.2  | /     | /     | 9.7  | 8.1  | 33.4 | 42.6 |
| 1500                          | 6.3  | /     | /     | 6.6  | 6.1  | 35.3 | 45.7 |

Table S2. The peak intensity of Ca II 393.4 nm, Sr II 407.8 nm, Ca I 422.7 nm, Sr I 460.7 nm, CaOH 554 nm, and SrOH 605 nm from 10 samples with different concentration. Data in this table correspond to Figure 5 in the manuscript. We selected the

sample of 20, 50, 400, 600, 1000, 2000, 2500 ppm as the calibration set, with the 100, 800, 1500 ppm as the prediction set. Calculate the error bar using the repeated peak intensity obtained from 10 laser pulses.

| Species | Laser pulse          |          | 1        | 2        | 3        | 4        | 5        | 6        | 7        | 8        | 9        | 10       |
|---------|----------------------|----------|----------|----------|----------|----------|----------|----------|----------|----------|----------|----------|
|         | Sample concentration |          |          |          |          |          |          |          |          |          |          |          |
| Ca II   | Calibration Set      | 20       | 14.92055 | 20.87515 | 15.04891 | 13.41021 | 17.71386 | 21.89298 | 13.40971 | 23.99448 | 17.16935 | 16.69024 |
|         |                      | 50       | 43.80495 | 42.16564 | 50.53535 | 42.37541 | 38.56249 | 49.33918 | 43.24142 | 48.78656 | 41.90394 | 53.68932 |
|         |                      | 400      | 234.9901 | 265.5613 | 231.1275 | 234.7932 | 232.0673 | 217.9418 | 247.8397 | 237.0706 | 237.0733 | 236.9983 |
|         |                      | 600      | 292.6944 | 291.5538 | 341.9801 | 294.3792 | 296.4072 | 283.46   | 290.057  | 291.6393 | 274.7746 | 285.038  |
|         |                      | 1000     | 381.1853 | 383.8576 | 371.8451 | 377.2468 | 375.475  | 385.2122 | 389.2142 | 384.9801 | 332.722  | 404.4169 |
|         |                      | 2000     | 554.0698 | 541.6968 | 564.174  | 533.9461 | 590.2651 | 499.413  | 540.0725 | 543.3196 | 542.7617 | 519.7726 |
|         | 2500                 | 613.6848 | 576.1615 | 607.8237 | 568.0935 | 632.3486 | 627.1459 | 642.4574 | 611.8319 | 582.3854 | 592.2181 |          |
|         | Prediction Set       | 100      | 103.7495 | 106.4154 | 100.7913 | 95.68576 | 96.94882 | 101.9238 | 105.6263 | 103.8    | 94.39546 | 99.9731  |
|         |                      | 800      | 357.6771 | 331.0219 | 314.1208 | 345.0874 | 341.2995 | 369.3152 | 332.276  | 329.6266 | 355.0964 | 364.5397 |
| 1500    |                      | 519.0058 | 468.0604 | 477.4031 | 468.162  | 486.1851 | 480.3839 | 503.0887 | 448.5675 | 464.8277 | 483.1634 |          |
| Ca I    | Calibration Set      | 20       | 94.16566 | 95.74506 | 93.99124 | 89.61811 | 92.37885 | 106.6028 | 91.69244 | 95.5262  | 99.76464 | 98.05206 |
|         |                      | 50       | 227.6779 | 226.2741 | 234.5402 | 223.4602 | 222.9635 | 228.52   | 234.7301 | 227.7955 | 228.7181 | 236.2482 |
|         |                      | 400      | 2133.517 | 2194.725 | 2068.557 | 2145.955 | 2042.795 | 2071.715 | 2176.58  | 2047.712 | 2110.1   | 2125.81  |
|         |                      | 600      | 2682.061 | 2761.893 | 3030.081 | 2760.581 | 2809.406 | 2673.723 | 2794.641 | 2791.145 | 2629.679 | 2681.756 |
|         |                      | 1000     | 3954.541 | 3805.747 | 4033.021 | 3910.117 | 3860.165 | 3766.879 | 3993.143 | 3996.674 | 3618.568 | 4095.454 |
|         |                      | 2000     | 5745.573 | 5545.168 | 5858.57  | 5532.059 | 5926.129 | 5458.128 | 5586.414 | 5858.061 | 5582.956 | 5579.125 |
|         | 2500                 | 6425.741 | 6334.06  | 6476.719 | 6282.098 | 6549.021 | 6312.948 | 6506.486 | 6366.623 | 6229.273 | 6376.175 |          |
|         | Prediction Set       | 100      | 603.3096 | 606.4149 | 603.8882 | 584.9709 | 592.9723 | 647.0983 | 646.537  | 658.6259 | 566.6898 | 639.0192 |
|         |                      | 800      | 3550.31  | 3384.014 | 3229.513 | 3438.92  | 3506.071 | 3475.341 | 3416.536 | 3351.107 | 3463.183 | 3499.44  |
| 1500    |                      | 5334.056 | 4969.714 | 4940.218 | 4873.745 | 5115.324 | 5007.388 | 5046.454 | 4955.702 | 4911.482 | 4990.079 |          |

|       |                 |          |          |          |          |          |          |          |          |          |          |          |
|-------|-----------------|----------|----------|----------|----------|----------|----------|----------|----------|----------|----------|----------|
| CaOH  | Calibration Set | 20       | 26.81109 | 27.78908 | 27.51645 | 26.82253 | 24.8129  | 29.16061 | 27.60401 | 25.95233 | 26.86651 | 33.04958 |
|       |                 | 50       | 61.71866 | 63.98456 | 59.74256 | 55.30845 | 57.46366 | 61.08094 | 61.64993 | 55.17949 | 57.54853 | 59.6233  |
|       |                 | 400      | 553.2494 | 597.1908 | 599.7829 | 612.2962 | 568.0744 | 587.8455 | 567.9689 | 607.4775 | 581.1247 | 564.1619 |
|       |                 | 600      | 888.2216 | 832.7908 | 902.2039 | 905.5677 | 893.5747 | 872.6786 | 821.1079 | 862.7866 | 840.1789 | 888.3679 |
|       |                 | 1000     | 1530.614 | 1461.663 | 1451.393 | 1432.534 | 1537.64  | 1497.821 | 1474.43  | 1491.324 | 1419.688 | 1466.358 |
|       |                 | 2000     | 2848.534 | 2954.004 | 2972.213 | 2918.601 | 2991.84  | 2868.722 | 2721.264 | 3104.557 | 2745.064 | 2929.922 |
|       | 2500            | 3430.762 | 3619.805 | 3541.238 | 3390.259 | 3668.238 | 3529.933 | 3560.289 | 3600.916 | 3777.585 | 3447.014 |          |
|       | Prediction Set  | 100      | 136.7443 | 134.0919 | 140.5832 | 134.0159 | 139.3282 | 138.6272 | 143.6429 | 143.8853 | 137.8649 | 147.4645 |
|       |                 | 800      | 1175.475 | 1223.344 | 1185.514 | 1198.384 | 1195.47  | 1252.481 | 1203.445 | 1204.318 | 1186.417 | 1247.94  |
| 1500  |                 | 2337.692 | 2283.68  | 2192.818 | 2215.702 | 2256.874 | 2339.502 | 2275.748 | 2264.77  | 2303.669 | 2317.257 |          |
| Sr II | Calibration Set | 20       | 21.25844 | 28.14529 | 20.26445 | 22.03069 | 15.80073 | 24.61249 | 21.44446 | 20.05426 | 21.99138 | 19.97874 |
|       |                 | 50       | 70.64991 | 67.59276 | 69.23294 | 73.13641 | 65.90474 | 68.73398 | 69.01176 | 73.29287 | 68.16008 | 69.32646 |
|       |                 | 400      | 292.9604 | 317.2945 | 279.7392 | 286.1119 | 281.4728 | 288.2537 | 304.9437 | 278.9953 | 301.095  | 282.4016 |
|       |                 | 600      | 354.1866 | 361.0484 | 417.5706 | 359.9953 | 381.0792 | 350.0803 | 381.4598 | 363.3113 | 345.9484 | 341.4577 |
|       |                 | 1000     | 495.1922 | 474.0207 | 486.871  | 485.3812 | 481.1894 | 471.8581 | 496.2301 | 507.5907 | 439.6772 | 490.1897 |
|       |                 | 2000     | 746.3324 | 710.4682 | 742.5226 | 688.3153 | 786.5654 | 668.991  | 708.0766 | 724.6295 | 710.5325 | 697.9721 |
|       | 2500            | 827.9118 | 782.5218 | 820.4385 | 772.4702 | 843.9716 | 818.4558 | 837.3981 | 811.826  | 793.3997 | 813.7486 |          |
|       | Prediction Set  | 100      | 137.7783 | 134.1469 | 122.4243 | 128.5057 | 127.2063 | 133.7737 | 124.6757 | 138.3222 | 119.4187 | 132.3641 |
|       |                 | 800      | 468.846  | 427.907  | 404.4984 | 440.9167 | 472.2185 | 447.3614 | 426.8702 | 430.1658 | 453.2425 | 452.8221 |
| 1500  |                 | 690.3713 | 608.1895 | 617.1743 | 610.8351 | 632.5375 | 630.5762 | 653.1129 | 596.1616 | 591.5811 | 603.4721 |          |
| Sr I  | Calibration Set | 20       | 42.00565 | 43.28455 | 43.48789 | 39.54416 | 42.39537 | 47.79337 | 44.89763 | 45.42289 | 46.46951 | 41.08374 |
|       |                 | 50       | 132.8361 | 148.6662 | 141.0009 | 139.1544 | 133.006  | 134.1055 | 135.7359 | 141.6334 | 138.5669 | 136.6349 |
|       |                 | 400      | 1435.183 | 1450.199 | 1352.339 | 1430.833 | 1331.949 | 1382.101 | 1445.282 | 1342.463 | 1415.945 | 1406.947 |
|       |                 | 600      | 1841.35  | 1839.589 | 2134.577 | 1886.537 | 1915.762 | 1854.123 | 1938.806 | 1900.294 | 1813.809 | 1778.16  |
|       |                 | 1000     | 3016.09  | 2916.397 | 3062.007 | 2968.917 | 2832.703 | 2870.233 | 3077.263 | 3026.621 | 2737.007 | 3088.677 |

|                |                |                 |          |          |          |          |          |          |          |          |          |          |
|----------------|----------------|-----------------|----------|----------|----------|----------|----------|----------|----------|----------|----------|----------|
|                |                | 2000            | 5003.768 | 4722.347 | 5040.368 | 4752.521 | 5137.459 | 4713.938 | 4840.204 | 5080.197 | 4864.641 | 4846.39  |
|                |                | 2500            | 5765.432 | 5684.738 | 5735.245 | 5636.878 | 5905.749 | 5693.483 | 5824.082 | 5716.552 | 5587.11  | 5631.128 |
|                | Prediction Set | 100             | 356.7727 | 365.0379 | 344.8566 | 329.4142 | 343.7719 | 373.1699 | 370.0623 | 370.08   | 334.7158 | 374.6228 |
|                |                | 800             | 2646.265 | 2476.875 | 2363.582 | 2564.246 | 2634.794 | 2548.151 | 2505.86  | 2426.945 | 2562.46  | 2595.838 |
|                |                | 1500            | 4305.727 | 4034.27  | 4036.96  | 3906.62  | 4104.82  | 4080.337 | 4085.129 | 4049.43  | 4025.296 | 4104.137 |
|                | SrOH           | Calibration Set | 20       | 18.47568 | 17.47978 | 15.96529 | 12.90633 | 16.332   | 15.44069 | 19.6609  | 19.97659 | 18.78753 |
| 50             |                |                 | 33.15672 | 36.40819 | 31.92507 | 33.74467 | 34.0939  | 38.53229 | 33.84241 | 32.76594 | 31.12317 | 32.13956 |
| 400            |                |                 | 316.662  | 340.7843 | 327.9121 | 341.0348 | 323.7646 | 339.0352 | 327.0718 | 350.0608 | 348.614  | 320.9864 |
| 600            |                |                 | 506.8491 | 486.4398 | 513.9102 | 513.3093 | 511.1672 | 508.6644 | 478.932  | 493.5562 | 488.5627 | 496.3343 |
| 1000           |                |                 | 833.333  | 843.522  | 831.7421 | 806.2528 | 857.5652 | 872.9779 | 825.02   | 851.3753 | 808.4801 | 823.913  |
| 2000           |                |                 | 1573.66  | 1620.392 | 1610.121 | 1643.289 | 1664.152 | 1577.695 | 1509.947 | 1747.647 | 1518.482 | 1632.743 |
| 2500           |                |                 | 1885.306 | 1985.01  | 1867.617 | 1854.125 | 1983.926 | 1895.077 | 1901.123 | 1961.117 | 2024.862 | 1861.67  |
| Prediction Set |                | 100             | 75.38786 | 70.14912 | 76.21245 | 68.52939 | 68.15306 | 69.35999 | 68.35667 | 75.38683 | 72.57521 | 70.67712 |
|                |                | 800             | 666.5837 | 687.5708 | 683.4894 | 694.2816 | 690.3584 | 728.3346 | 681.4189 | 695.432  | 678.5682 | 702.8182 |
|                |                | 1500            | 1276.893 | 1229.876 | 1197.195 | 1224.946 | 1246.861 | 1244.16  | 1218.898 | 1252.661 | 1274.422 | 1289.857 |

Table S3. RSDs of the intensities of Ca II 393.4 nm, Ca I 422.7 nm, CaOH 554 nm, Sr II 407.8 nm, Sr I 460.7 nm, and SrOH 605 nm at 0.1 MPa. Data in this table correspond to Figure 6 in the manuscript.

| Species | RSD | Error bar of RSD |
|---------|-----|------------------|
| Ca II   | 4.8 | 0.35             |
| Ca I    | 3.1 | 0.55             |
| CaOH    | 3   | 0.35             |
| Sr II   | 4.5 | 0.5              |
| Sr I    | 3.5 | 0.6              |
| SrOH    | 3.2 | 0.45             |

Table S4. Normalized peak intensities of Ca II 393.4 nm, Ca I 422.7 nm, CaOH 554 nm, Sr II 407.8 nm, Sr I 460.7 nm, and SrOH 605 nm at pressures ranging from 0.1 to 50 MPa. Calculate the error bar using the repeated peak intensity obtained from 6 laser pulses. Data in this table correspond to Figure 7(a) in the manuscript.

| Species<br>Pressure | Ca II   | Error bar<br>of Ca II | Sr II   | Error bar<br>of Sr II | Ca I    | Error bar<br>of Ca I | Sr I    | Error bar<br>of Sr I | CaOH    | Error bar<br>of CaOH | SrOH    | Error bar<br>of SrOH |
|---------------------|---------|-----------------------|---------|-----------------------|---------|----------------------|---------|----------------------|---------|----------------------|---------|----------------------|
| 0.1                 | 0.74499 | 0.00596               | 0.82579 | 0.0149                | 0.93869 | 0.0089               | 0.9821  | 0.01184              | 0.99018 | 0.00695              | 0.97599 | 0.01692              |
| 5                   | 0.75465 | 0.00608               | 0.83214 | 0.01206               | 0.93018 | 0.00569              | 0.9442  | 0.00716              | 0.9704  | 0.00966              | 0.96864 | 0.0169               |
| 10                  | 0.78053 | 0.0178                | 0.84301 | 0.01406               | 0.93473 | 0.00879              | 0.93618 | 0.01059              | 0.96951 | 0.00906              | 0.95709 | 0.00952              |
| 20                  | 0.84253 | 0.01722               | 0.8859  | 0.01781               | 0.95384 | 0.01108              | 0.92376 | 0.01221              | 0.95718 | 0.01262              | 0.94152 | 0.00994              |
| 30                  | 0.86898 | 0.01022               | 0.90877 | 0.01017               | 0.95427 | 0.00392              | 0.90219 | 0.00327              | 0.94286 | 0.01401              | 0.9211  | 0.02398              |
| 40                  | 0.9617  | 0.01883               | 0.98081 | 0.01329               | 0.99093 | 0.00687              | 0.90494 | 0.00944              | 0.96492 | 0.00762              | 0.94542 | 0.01751              |
| 50                  | 0.98526 | 0.01215               | 0.98028 | 0.0145                | 0.9808  | 0.00448              | 0.85722 | 0.00808              | 0.98675 | 0.00744              | 0.95812 | 0.01238              |

Table S5. RSDs of the intensities of Ca II 393.4 nm, Ca I 422.7 nm, CaOH 554 nm, Sr II 407.8 nm, Sr I 460.7 nm, and SrOH 605 nm at pressures ranging from 0.1 to 50 MPa. Data in this table correspond to Figure 7(b) in the manuscript.

| Species | RSD   | Error bar of RSD |
|---------|-------|------------------|
| Ca II   | 13.03 | 2.41             |
| Ca I    | 6.21  | 1.415            |
| CaOH    | 5.25  | 1.34             |
| Sr II   | 10.22 | 2.17             |
| Sr I    | 7.08  | 0.945            |
| SrOH    | 7.12  | 1.5              |

Table S6. The peak intensity of Ca II 393.4 nm, Sr II 407.8 nm, Ca I 422.7 nm, Sr I 460.7 nm, CaOH 554 nm, and SrOH 605 nm from 11 samples with different concentration. Data in this table correspond to Figure 9 in the manuscript. We selected the sample of 20, 50, 200, 400, 600, 1000, 2000, 2500 ppm as the calibration set, with the 100, 800, 1500 ppm as the prediction set. Calculate the error bar using the repeated peak intensity obtained from 6 laser pulses.

| Species & Pressure | Laser pulse          |      | 1        | 2        | 3        | 4        | 5        | 6        |
|--------------------|----------------------|------|----------|----------|----------|----------|----------|----------|
|                    | Sample concentration |      |          |          |          |          |          |          |
| Ca II & 0.1 MPa    | Calibration Set      | 20   | 31.28887 | 32.35525 | 28.87713 | 32.34092 | 27.7358  | 30.07382 |
|                    |                      | 50   | 64.80469 | 63.16485 | 64.51518 | 70.78401 | 60.0517  | 53.05441 |
|                    |                      | 200  | 108.8347 | 117.6094 | 102.7095 | 139.8085 | 121.8883 | 112.7721 |
|                    |                      | 400  | 154.9151 | 156.9991 | 161.5631 | 157.0232 | 156.3289 | 157.944  |
|                    |                      | 600  | 385.7166 | 365.8656 | 335.9788 | 396.8617 | 381.2556 | 356.8949 |
|                    |                      | 1000 | 490.1672 | 493.4971 | 498.5547 | 498.1727 | 507.836  | 502.1405 |
|                    |                      | 2000 | 704.1339 | 725.935  | 784.5393 | 712.0822 | 724.3834 | 678.0722 |
|                    | Prediction Set       | 100  | 96.59576 | 83.57463 | 92.69509 | 87.24412 | 82.42663 | 84.00943 |
|                    |                      | 800  | 468.4677 | 488.9812 | 463.6139 | 526.7385 | 475.3143 | 473.4433 |
|                    |                      | 1500 | 611.5306 | 592.3054 | 597.8162 | 580.1903 | 612.4336 | 622.316  |
| Ca II & 5 MPa      | Calibration Set      | 20   | 42.3795  | 43.85042 | 39.27601 | 47.23762 | 43.61397 | 38.32842 |
|                    |                      | 50   | 55.82139 | 53.84755 | 67.70262 | 54.53384 | 60.13807 | 55.57074 |
|                    |                      | 200  | 109.075  | 117.4614 | 110.8417 | 107.2583 | 111.1192 | 105.4424 |
|                    |                      | 400  | 228.0842 | 267.2001 | 265.0159 | 248      | 262.7225 | 233.4705 |
|                    |                      | 600  | 379.2275 | 380.3766 | 400.3858 | 398.4867 | 408.708  | 405.7117 |
|                    |                      | 1000 | 489.5375 | 468.8653 | 434.4651 | 472.9059 | 470.3897 | 493.2542 |
|                    |                      | 2000 | 719.033  | 821.9934 | 788.5966 | 828.9847 | 805.7983 | 725.7455 |

|                      |                      |                 |          |          |          |          |          |          |          |
|----------------------|----------------------|-----------------|----------|----------|----------|----------|----------|----------|----------|
|                      | Prediction Set       | 2500            | 925.4661 | 879.8426 | 943.1636 | 832.2806 | 872.1678 | 900.4009 |          |
|                      |                      | 100             | 82.75957 | 85.2938  | 86.08453 | 77.15382 | 78.21252 | 85.34666 |          |
|                      |                      | 800             | 470.6247 | 461.8089 | 485.8804 | 488.1314 | 468.4244 | 513.0882 |          |
|                      |                      | 1500            | 524.6128 | 531.8547 | 496.1499 | 534.571  | 490.5993 | 529.0263 |          |
| Ca II<br>&<br>10 MPa | Calibration Set      | 20              | 47.7409  | 47.67422 | 37.6701  | 40.68185 | 39.90685 | 39.89402 |          |
|                      |                      | 50              | 62.06303 | 51.09483 | 55.88877 | 65.23714 | 64.00949 | 59.57392 |          |
|                      |                      | 200             | 115.9719 | 106.9563 | 97.4415  | 94.89004 | 113.7486 | 99.83943 |          |
|                      |                      | 400             | 288.503  | 260.0883 | 292.9308 | 313.5317 | 273.4164 | 267.2829 |          |
|                      |                      | 600             | 475.3361 | 437.2476 | 423.0443 | 434.5069 | 436.1627 | 458.41   |          |
|                      |                      | 1000            | 496.5737 | 432.8331 | 521.9859 | 492.513  | 514.0241 | 506.3739 |          |
|                      |                      | 2000            | 768.2806 | 807.2532 | 699.7016 | 766.41   | 805.3633 | 831.1062 |          |
|                      | 2500                 | 892.66          | 828.4463 | 866.8297 | 827.1301 | 814.2607 | 884.9588 |          |          |
|                      | Prediction Set       | 100             | 94.86243 | 80.07166 | 85.7025  | 79.88545 | 85.5399  | 97.8049  |          |
|                      |                      | 800             | 456.0406 | 429.7194 | 424.9216 | 433.5219 | 442.2048 | 410.3125 |          |
|                      |                      | 1500            | 632.5862 | 630.5255 | 649.8476 | 624.0836 | 637.0331 | 691.6994 |          |
|                      | Ca II<br>&<br>20 MPa | Calibration Set | 20       | 45.15305 | 46.74597 | 46.36103 | 49.24557 | 45.38829 | 51.43843 |
|                      |                      |                 | 50       | 62.00679 | 66.22028 | 60.82872 | 67.61959 | 63.72151 | 73.53725 |
| 200                  |                      |                 | 117.8974 | 133.7486 | 125.0504 | 107.9376 | 105.4512 | 120.5756 |          |
| 400                  |                      |                 | 313.2137 | 332.9921 | 330.4703 | 299.4718 | 294.913  | 283.2912 |          |
| 600                  |                      |                 | 499.0546 | 474.7799 | 503.4166 | 458.1011 | 450.7615 | 506.0884 |          |
| 1000                 |                      |                 | 563.9936 | 564.4459 | 589.4979 | 570.8566 | 551.409  | 533.1257 |          |
| 2000                 |                      |                 | 727.8717 | 812.615  | 767.3797 | 703.3635 | 735.4343 | 938.6781 |          |
| 2500                 |                      | 965.0994        | 967.6534 | 943.0836 | 1007.529 | 1014.78  | 974.9142 |          |          |
| Prediction Set       |                      | 100             | 81.34318 | 84.74613 | 81.00243 | 89.59553 | 86.66057 | 90.50272 |          |
|                      |                      | 800             | 550.7991 | 488.8298 | 489.1097 | 466.4916 | 475.1909 | 467.3513 |          |

|                      |                    |          |          |          |          |          |          |          |
|----------------------|--------------------|----------|----------|----------|----------|----------|----------|----------|
|                      |                    | 1500     | 644.5504 | 707.3505 | 593.8932 | 620.2394 | 661.4554 | 610.4617 |
| Ca II<br>&<br>30 MPa | Calibration<br>Set | 20       | 50.3524  | 41.55453 | 58.09092 | 56.36638 | 58.18626 | 45.83399 |
|                      |                    | 50       | 61.37689 | 63.06587 | 72.44127 | 73.63264 | 56.75837 | 60.35472 |
|                      |                    | 200      | 111.2094 | 128.2437 | 127.7168 | 124.8619 | 107.759  | 95.89192 |
|                      |                    | 400      | 328.5741 | 324.0674 | 335.9666 | 327.2604 | 322.3312 | 311.2463 |
|                      |                    | 600      | 483.1569 | 505.6467 | 487.5065 | 502.9213 | 454.6749 | 541.4292 |
|                      |                    | 1000     | 563.2513 | 536.2952 | 527.8974 | 571.912  | 555.2923 | 556.9269 |
|                      |                    | 2000     | 825.8931 | 794.681  | 846.191  | 753.5671 | 832.9815 | 805.8982 |
|                      |                    | 2500     | 1036.068 | 1057.042 | 978.1367 | 997.1352 | 1072.709 | 937.8085 |
|                      | Prediction<br>Set  | 100      | 84.41686 | 79.56835 | 86.85044 | 91.15543 | 86.67365 | 86.15046 |
|                      |                    | 800      | 476.1115 | 456.4948 | 471.578  | 457.8416 | 516.6055 | 492.2177 |
| 1500                 |                    | 719.3242 | 715.8681 | 669.1427 | 746.6259 | 718.4663 | 692.4044 |          |
| Ca II<br>&<br>40 MPa | Calibration<br>Set | 20       | 58.88603 | 46.0622  | 58.73544 | 44.69584 | 52.15976 | 54.21463 |
|                      |                    | 50       | 62.14432 | 66.02481 | 66.95082 | 60.62813 | 67.61199 | 73.3996  |
|                      |                    | 200      | 113.9128 | 118.7501 | 118.2893 | 114.5323 | 133.9879 | 138.3494 |
|                      |                    | 400      | 363.4629 | 353.2304 | 316.7623 | 341.0362 | 327.6111 | 326.8653 |
|                      |                    | 600      | 600.3208 | 573.6008 | 555.1826 | 509.2489 | 537.4872 | 513.035  |
|                      |                    | 1000     | 614.703  | 662.7774 | 609.841  | 634.4064 | 630.6279 | 633.0687 |
|                      |                    | 2000     | 869.4368 | 932.6534 | 892.9047 | 898.6174 | 853.5026 | 1012.804 |
|                      |                    | 2500     | 1115.595 | 1203.134 | 1168.099 | 1108.236 | 1222.136 | 1123.607 |
|                      | Prediction<br>Set  | 100      | 81.11882 | 87.74285 | 88.54837 | 76.7052  | 93.43568 | 79.67553 |
|                      |                    | 800      | 520.7046 | 571.8288 | 609.085  | 549.6789 | 516.4453 | 544.2899 |
| 1500                 |                    | 734.5075 | 733.4729 | 734.3156 | 759.68   | 693.5475 | 798.3028 |          |
| Ca II                | Calibration<br>Set | 20       | 53.78477 | 59.35988 | 47.71701 | 55.6053  | 53.48128 | 42.19571 |
|                      |                    | 50       | 66.98143 | 64.53935 | 60.40895 | 64.34675 | 70.23679 | 71.99496 |

|                      |                 |      |          |          |          |          |          |          |
|----------------------|-----------------|------|----------|----------|----------|----------|----------|----------|
| &<br>50 MPa          |                 | 200  | 126.6443 | 141.7361 | 126.295  | 145.6089 | 125.7166 | 127.033  |
|                      |                 | 400  | 390.0954 | 391.0928 | 398.3152 | 333.7797 | 355.8018 | 379.6172 |
|                      |                 | 600  | 592.1065 | 571.2325 | 589.3823 | 598.2028 | 576.474  | 614.7717 |
|                      |                 | 1000 | 583.582  | 608.3572 | 499.3642 | 607.6525 | 563.1637 | 554.3264 |
|                      |                 | 2000 | 955.7817 | 831.9541 | 909.2036 | 798.0251 | 800.7863 | 885.6488 |
|                      |                 | 2500 | 1214.978 | 1198.075 | 1209.541 | 1203.975 | 1329.877 | 1270.96  |
|                      | Prediction Set  | 100  | 91.08943 | 92.53365 | 94.37694 | 101.137  | 80.72933 | 95.23697 |
|                      |                 | 800  | 621.9931 | 726.3219 | 663.5263 | 663.4952 | 629.108  | 617.0768 |
|                      |                 | 1500 | 672.2598 | 726.4569 | 699.2124 | 650.743  | 746.7726 | 699.4459 |
| Ca I<br>&<br>0.1 MPa | Calibration Set | 20   | 80.07331 | 67.08762 | 87.69524 | 83.6658  | 83.87064 | 80.11935 |
|                      |                 | 50   | 228.2124 | 239.5763 | 253.2321 | 249.8783 | 219.7208 | 230.1813 |
|                      |                 | 200  | 925.8951 | 944.4581 | 912.7136 | 1075.167 | 971.0508 | 977.3791 |
|                      |                 | 400  | 1591.732 | 1643.551 | 1581.22  | 1669.817 | 1595.455 | 1637.851 |
|                      |                 | 600  | 4262.059 | 4238.425 | 4080.494 | 4157.743 | 4446.111 | 4201.901 |
|                      |                 | 1000 | 5887.018 | 5893.615 | 6099.619 | 6100.749 | 6160.481 | 6045.136 |
|                      |                 | 2000 | 8706.761 | 8991.761 | 9315.499 | 9023.983 | 8978.695 | 8890.66  |
|                      |                 | 2500 | 10659.75 | 10616.43 | 10282.71 | 10459.97 | 10482.35 | 10861.24 |
|                      | Prediction Set  | 100  | 512.1874 | 494.7338 | 487.0917 | 506.6341 | 487.1231 | 490.1672 |
|                      |                 | 800  | 5336.372 | 5258.531 | 5360.013 | 5818.697 | 5385.458 | 5695.281 |
|                      |                 | 1500 | 7403.665 | 7554.814 | 7484.11  | 7411.154 | 7548.758 | 7643.953 |
|                      |                 |      |          |          |          |          |          |          |
| Ca I<br>&            | Calibration Set | 20   | 112.2923 | 115.9195 | 127.9856 | 121.1483 | 125.7461 | 107.1913 |
|                      |                 | 50   | 209.4587 | 227.1781 | 267.9825 | 229.8521 | 220.3876 | 236.2766 |
|                      |                 | 200  | 877.9927 | 859.1525 | 869.982  | 919.1089 | 846.5798 | 904.1032 |
|                      |                 | 400  | 2284.486 | 2389.456 | 2441.863 | 2297.411 | 2380.445 | 2359.009 |
|                      |                 | 600  | 4111.98  | 4053.328 | 4267.973 | 4314.141 | 4315.131 | 4218.322 |

|                     |                     |                 |          |          |          |          |          |          |
|---------------------|---------------------|-----------------|----------|----------|----------|----------|----------|----------|
| 5 MPa               |                     | 1000            | 5799.809 | 5626.202 | 5498.771 | 5858.524 | 5844.604 | 5923.686 |
|                     |                     | 2000            | 8988.155 | 9503.372 | 9132.213 | 9338.737 | 9243.145 | 8945.556 |
|                     |                     | 2500            | 10410.15 | 10424.18 | 10810.05 | 10296.34 | 10500.77 | 10682.03 |
|                     | Prediction Set      | 100             | 471.3462 | 489.9998 | 448.3546 | 456.9769 | 472.9944 | 464.1953 |
|                     |                     | 800             | 5318.48  | 5320.032 | 5489.79  | 5275.666 | 5262.013 | 5364.16  |
|                     |                     | 1500            | 6670.236 | 6714.225 | 6649.941 | 6639.782 | 6751.328 | 6740.82  |
| Ca I<br>&<br>10 MPa | Calibration Set     | 20              | 125.479  | 126.5749 | 115.1137 | 114.0928 | 117.0714 | 111.3761 |
|                     |                     | 50              | 228.6162 | 234.293  | 213.8938 | 220.2916 | 228.4554 | 229.4154 |
|                     |                     | 200             | 872.7276 | 857.0823 | 835.8934 | 831.912  | 890.1882 | 845.4984 |
|                     |                     | 400             | 2561.636 | 2345.507 | 2518.251 | 2440.086 | 2389.499 | 2467.072 |
|                     |                     | 600             | 4352.322 | 4474.769 | 4162.184 | 4336.413 | 4510.203 | 4561.453 |
|                     |                     | 1000            | 5966.917 | 5495.522 | 5864.826 | 5946.396 | 5751.342 | 5895.7   |
|                     |                     | 2000            | 9064.061 | 9501.344 | 8730.109 | 9401.794 | 9239.234 | 9432.335 |
|                     |                     | 2500            | 9743.954 | 9673.284 | 9921.6   | 9877.381 | 9587.797 | 9976.022 |
|                     | Prediction Set      | 100             | 470.801  | 442.486  | 478.9495 | 466.6554 | 495.5939 | 475.3046 |
|                     |                     | 800             | 4917.414 | 5066.972 | 5041.492 | 4831.197 | 5036.922 | 4790.355 |
|                     |                     | 1500            | 7517.005 | 7445.868 | 7774.7   | 7612.101 | 7699.871 | 8030.509 |
|                     | Ca I<br>&<br>20 MPa | Calibration Set | 20       | 125.0566 | 122.1621 | 113.2875 | 123.861  | 115.7515 |
| 50                  |                     |                 | 232.4045 | 216.7148 | 232.3815 | 231.2255 | 219.1538 | 218.2895 |
| 200                 |                     |                 | 849.481  | 892.7063 | 879.8905 | 872.7465 | 820.6788 | 935.5508 |
| 400                 |                     |                 | 2585.856 | 2557.996 | 2520.821 | 2411.67  | 2459.808 | 2363.523 |
| 600                 |                     |                 | 4514.134 | 4555.4   | 4415.656 | 4447.007 | 4364.218 | 4621.27  |
| 1000                |                     |                 | 6032.313 | 6198.076 | 6079.869 | 6151.491 | 6029.918 | 5924.481 |
| 2000                |                     |                 | 8570.828 | 9010.255 | 8700.017 | 8447.471 | 8513.71  | 9358.819 |
| 2500                |                     |                 | 10396.14 | 10520.7  | 10301.59 | 10940.68 | 11112.71 | 11115.76 |

|                     |                     |                 |          |          |          |          |          |          |          |
|---------------------|---------------------|-----------------|----------|----------|----------|----------|----------|----------|----------|
|                     | Prediction Set      | 100             | 423.4888 | 458.3511 | 427.7948 | 448.9076 | 430.5348 | 480.9302 |          |
|                     |                     | 800             | 5433.675 | 5199.123 | 5265.95  | 4991.403 | 5029.932 | 4987.51  |          |
|                     |                     | 1500            | 7619.543 | 7700.053 | 7375.259 | 7394.735 | 7828.34  | 7590.08  |          |
| Ca I<br>&<br>30 MPa | Calibration Set     | 20              | 121.7627 | 116.5788 | 113.0324 | 116.7458 | 122.0309 | 107.4168 |          |
|                     |                     | 50              | 222.2484 | 215.6739 | 239.408  | 216.2796 | 230.136  | 201.3513 |          |
|                     |                     | 200             | 824.6179 | 860.6422 | 895.462  | 844.3373 | 861.8877 | 873.7216 |          |
|                     |                     | 400             | 2533.17  | 2406.974 | 2559.193 | 2440.373 | 2312.193 | 2413.35  |          |
|                     |                     | 600             | 4392.635 | 4530.117 | 4519.018 | 4581.259 | 4130.634 | 4572.457 |          |
|                     |                     | 1000            | 5819.407 | 5963.992 | 5895.882 | 6018.489 | 5963.256 | 6039.153 |          |
|                     |                     | 2000            | 9073.395 | 8911.413 | 9348.401 | 8866.341 | 9078.846 | 9277.571 |          |
|                     | 2500                | 10789.79        | 10996.44 | 10484.34 | 10588.61 | 11087.96 | 10446.98 |          |          |
|                     | Prediction Set      | 100             | 437.2905 | 426.3175 | 456.7634 | 442.457  | 462.2806 | 445.9324 |          |
|                     |                     | 800             | 4929.641 | 4770.484 | 4988.986 | 4801.95  | 4915.969 | 4992.433 |          |
|                     |                     | 1500            | 7735.419 | 7733.119 | 7696.248 | 7719.08  | 7882.997 | 7688.022 |          |
|                     | Ca I<br>&<br>40 MPa | Calibration Set | 20       | 124.3256 | 102.8936 | 101.0128 | 124.02   | 115.6763 | 118.9886 |
|                     |                     |                 | 50       | 192.699  | 193.2837 | 198.3908 | 190.5228 | 214.0809 | 199.8557 |
| 200                 |                     |                 | 843.5121 | 766.4562 | 832.7137 | 754.8491 | 852.2514 | 819.6779 |          |
| 400                 |                     |                 | 2457.901 | 2287.916 | 2296.635 | 2350.63  | 2434.088 | 2281.154 |          |
| 600                 |                     |                 | 4676.592 | 4763.391 | 4391.883 | 4453.885 | 4406.278 | 4479.984 |          |
| 1000                |                     |                 | 6144.468 | 6241.239 | 5989.156 | 6354.328 | 6173.575 | 6163.891 |          |
| 2000                |                     |                 | 9316.425 | 9817.543 | 9575.401 | 9734.566 | 9278.392 | 10069.57 |          |
| 2500                |                     | 11658.26        | 11626.48 | 11771.45 | 11226.25 | 11660.19 | 11348.42 |          |          |
| Prediction Set      |                     | 100             | 437.0003 | 413.5532 | 388.995  | 422.4089 | 412.059  | 417.9941 |          |
|                     |                     | 800             | 5068.1   | 5083.966 | 5332.684 | 5081.762 | 5174.43  | 5063.834 |          |
|                     |                     | 1500            | 7831.422 | 7698.092 | 7892.229 | 7943.676 | 7491.779 | 8245.435 |          |

|                       |                    |          |          |          |          |          |          |          |
|-----------------------|--------------------|----------|----------|----------|----------|----------|----------|----------|
| Ca I<br>&<br>50 MPa   | Calibration<br>Set | 20       | 121.0169 | 119.6253 | 106.1984 | 115.5103 | 111.6323 | 109.0495 |
|                       |                    | 50       | 194.029  | 215.2472 | 217.5942 | 227.3086 | 222.3485 | 208.1523 |
|                       |                    | 200      | 772.092  | 792.4909 | 816.6306 | 785.8355 | 798.7511 | 778.6103 |
|                       |                    | 400      | 2325.734 | 2374.423 | 2469.009 | 2242.759 | 2228.918 | 2483.334 |
|                       |                    | 600      | 4639.78  | 4359.736 | 4598.001 | 4512.633 | 4566.999 | 4627.445 |
|                       |                    | 1000     | 5639.52  | 5753.851 | 5390.943 | 5878.923 | 5520.479 | 5461.277 |
|                       |                    | 2000     | 9607.995 | 9183.599 | 9429.37  | 8864.749 | 8893.81  | 9348.956 |
|                       | 2500               | 11765    | 11707.71 | 11913.93 | 11665.9  | 12327.3  | 12060.01 |          |
|                       | Prediction<br>Set  | 100      | 418.5638 | 388.158  | 412.009  | 421.0809 | 410.0846 | 376.6035 |
|                       |                    | 800      | 5490.848 | 5802.094 | 5574.221 | 5641.043 | 5379.569 | 5311.755 |
| 1500                  |                    | 7292.333 | 7792.102 | 7527.581 | 7515.538 | 7765.167 | 7511.359 |          |
| Sr II<br>&<br>0.1 MPa | Calibration<br>Set | 20       | 27.51064 | 24.23143 | 28.99346 | 30.1393  | 32.13978 | 37.24352 |
|                       |                    | 50       | 81.44161 | 72.48982 | 78.46996 | 86.73776 | 68.55095 | 81.1401  |
|                       |                    | 200      | 152.1981 | 173.9533 | 180.2585 | 182.8494 | 186.2323 | 181.2834 |
|                       |                    | 400      | 234.1002 | 229.4427 | 247.4975 | 248.1996 | 242.918  | 264.6497 |
|                       |                    | 600      | 582.7376 | 588.3974 | 540.0567 | 605.5586 | 639.4138 | 581.1721 |
|                       |                    | 1000     | 824.7574 | 825.1709 | 853.6223 | 899.5382 | 846.1027 | 852.1698 |
|                       |                    | 2000     | 1223.589 | 1272.241 | 1317.302 | 1266.231 | 1297.45  | 1204.524 |
|                       | 2500               | 1598.782 | 1582.505 | 1533.4   | 1562.074 | 1508.54  | 1598.818 |          |
|                       | Prediction<br>Set  | 100      | 123.9448 | 123.3548 | 135.3462 | 119.5516 | 117.3634 | 129.1264 |
|                       |                    | 800      | 681.4113 | 752.2258 | 722.3387 | 817.7673 | 740.8083 | 789.4928 |
| 1500                  |                    | 991.3204 | 1111.799 | 988.8906 | 1048.253 | 1051.056 | 1051.819 |          |
| Sr II                 | Calibration<br>Set | 20       | 36.6631  | 40.18117 | 35.94642 | 37.72352 | 47.51528 | 35.84997 |
|                       |                    | 50       | 77.48063 | 68.66202 | 84.99328 | 79.31886 | 84.13038 | 79.76684 |
|                       |                    | 200      | 167.8462 | 178.1064 | 178.6589 | 159.3479 | 175.7922 | 168.9967 |

|                           |                 |         |          |          |          |          |          |          |
|---------------------------|-----------------|---------|----------|----------|----------|----------|----------|----------|
| &<br>5 MPa                |                 | 400     | 361.2472 | 401.4008 | 400.6057 | 394.8443 | 433.0931 | 357.9969 |
|                           |                 | 600     | 591.0435 | 589.3324 | 609.8004 | 654.8362 | 673.6848 | 631.1632 |
|                           |                 | 1000    | 778.3797 | 780.2242 | 765.702  | 791.2128 | 846.8084 | 797.5243 |
|                           |                 | 2000    | 1255.728 | 1483.251 | 1343.938 | 1402.392 | 1335.426 | 1285.492 |
|                           |                 | 2500    | 1593.956 | 1564.036 | 1577.022 | 1518.082 | 1545.393 | 1563.711 |
|                           | Prediction Set  | 100     | 103.6265 | 121.6767 | 125.316  | 105.2773 | 113.1541 | 123.0367 |
|                           |                 | 800     | 735.6354 | 753.424  | 777.292  | 753.7197 | 747.1371 | 752.2808 |
|                           |                 | 1500    | 918.5154 | 893.6373 | 849.1216 | 884.3908 | 861.5122 | 898.9054 |
| &<br>Sr II<br>&<br>10 MPa | Calibration Set | 20      | 43.82839 | 35.45514 | 32.58979 | 37.4971  | 36.21382 | 41.21446 |
|                           |                 | 50      | 75.02837 | 80.71205 | 77.60027 | 79.33284 | 92.06833 | 83.96036 |
|                           |                 | 200     | 157.0209 | 160.7796 | 155.653  | 160.2741 | 164.3223 | 153.4711 |
|                           |                 | 400     | 460.8176 | 405.9464 | 485.6089 | 457.4882 | 438.193  | 442.7019 |
|                           |                 | 600     | 687.5459 | 691.6856 | 636.3771 | 631.286  | 663.961  | 733.7909 |
|                           |                 | 1000    | 869.0215 | 760.1345 | 806.6731 | 841.7403 | 768.0678 | 801.0273 |
|                           |                 | 2000    | 1254.448 | 1407.555 | 1277.594 | 1378.229 | 1408.27  | 1404.137 |
|                           |                 | 2500    | 1413.21  | 1360.25  | 1508.535 | 1438.042 | 1413.921 | 1478.522 |
|                           | Prediction Set  | 100     | 129.7106 | 103.1116 | 108.7642 | 134.3467 | 113.3649 | 129.3425 |
|                           |                 | 800     | 647.891  | 696.2542 | 632.8459 | 667.1635 | 680.0436 | 639.4715 |
| 1500                      |                 | 1051.58 | 1026.581 | 1099.358 | 1024.745 | 1078.705 | 1157.013 |          |
| &<br>Sr II<br>&<br>20 MPa | Calibration Set | 20      | 36.69102 | 41.56465 | 36.98111 | 37.92145 | 52.66658 | 43.32288 |
|                           |                 | 50      | 80.25848 | 87.40116 | 77.10406 | 79.69234 | 87.23504 | 92.89527 |
|                           |                 | 200     | 161.2681 | 150.4172 | 160.8258 | 182.1167 | 145.7813 | 179.3371 |
|                           |                 | 400     | 478.8505 | 480.636  | 463.7136 | 465.7606 | 461.4086 | 445.4352 |
|                           |                 | 600     | 716.0326 | 700.1356 | 698.2391 | 719.8258 | 687.1807 | 724.2146 |
|                           |                 | 1000    | 896.1187 | 911.6398 | 902.5767 | 940.3157 | 854.0666 | 886.0448 |

|                      |                      |                 |          |          |          |          |          |          |          |
|----------------------|----------------------|-----------------|----------|----------|----------|----------|----------|----------|----------|
|                      | Prediction Set       | 2000            | 1250.933 | 1290.14  | 1216.456 | 1237.984 | 1273.711 | 1453.107 |          |
|                      |                      | 2500            | 1587.658 | 1580.112 | 1581.176 | 1706.467 | 1654.753 | 1693.897 |          |
|                      |                      | 100             | 106.7244 | 132.5035 | 122.737  | 128.9346 | 123.0439 | 118.3026 |          |
|                      |                      | 800             | 846.0333 | 777.8646 | 732.7911 | 705.1654 | 755.7357 | 729.2561 |          |
|                      |                      | 1500            | 1051.997 | 1052.889 | 999.1531 | 972.162  | 1077.338 | 1079.103 |          |
| Sr II<br>&<br>30 MPa | Calibration Set      | 20              | 46.82372 | 38.76081 | 40.44851 | 46.88161 | 43.71329 | 43.5766  |          |
|                      |                      | 50              | 84.53149 | 78.78419 | 98.09559 | 105.869  | 87.09249 | 71.18711 |          |
|                      |                      | 200             | 166.5785 | 183.2008 | 178.9348 | 162.3027 | 166.9183 | 162.104  |          |
|                      |                      | 400             | 532.8755 | 506.5491 | 490.6891 | 456.883  | 476.0822 | 470.2149 |          |
|                      |                      | 600             | 744.4647 | 734.5599 | 737.2322 | 751.6211 | 639.2879 | 822.2103 |          |
|                      |                      | 1000            | 859.8706 | 865.0127 | 878.0708 | 904.9778 | 897.5608 | 871.6381 |          |
|                      |                      | 2000            | 1318.771 | 1297.709 | 1373.486 | 1305.68  | 1257.544 | 1334.192 |          |
|                      |                      | 2500            | 1735.752 | 1689.816 | 1623.359 | 1635.231 | 1739.878 | 1551.251 |          |
|                      | Prediction Set       | 100             | 133.6509 | 116.6536 | 125.3276 | 130.6005 | 143.8734 | 128.4221 |          |
|                      |                      | 800             | 775.6003 | 692.3117 | 710.4684 | 703.9469 | 752.135  | 766.0323 |          |
|                      |                      | 1500            | 1154.343 | 1140.029 | 1089.147 | 1172.635 | 1139.3   | 1136.38  |          |
|                      | Sr II<br>&<br>40 MPa | Calibration Set | 20       | 40.51823 | 42.1623  | 41.01191 | 54.5763  | 45.68267 | 53.98744 |
|                      |                      |                 | 50       | 69.95632 | 77.81307 | 85.3152  | 70.63915 | 86.63597 | 86.75568 |
| 200                  |                      |                 | 178.0157 | 159.6043 | 178.9681 | 178.8731 | 151.7748 | 185.2963 |          |
| 400                  |                      |                 | 524.6237 | 486.8178 | 517.2114 | 480.8273 | 514.1207 | 467.3758 |          |
| 600                  |                      |                 | 852.4777 | 823.2721 | 775.0708 | 760.9247 | 816.2715 | 756.91   |          |
| 1000                 |                      |                 | 1000.608 | 940.5794 | 904.7699 | 1042.351 | 945.9492 | 972.1896 |          |
| 2000                 |                      |                 | 1379.972 | 1510.104 | 1472.71  | 1438.119 | 1394.506 | 1506.754 |          |
| 2500                 |                      |                 | 1837.526 | 1994.867 | 1853.254 | 1781.928 | 1845.991 | 1754.058 |          |
| Prediction           |                      | 100             | 111.6783 | 122.1592 | 117.2831 | 117.215  | 118.8049 | 125.88   |          |

|                      |                    |      |          |          |          |          |          |          |
|----------------------|--------------------|------|----------|----------|----------|----------|----------|----------|
|                      | Set                | 800  | 802.37   | 783.6855 | 868.5091 | 788.2693 | 761.8216 | 764.3969 |
|                      |                    | 1500 | 1197.37  | 1182.712 | 1150.757 | 1224.853 | 1112.555 | 1342.357 |
| Sr II<br>&<br>50 MPa | Calibration<br>Set | 20   | 45.35214 | 54.59156 | 42.73063 | 41.96766 | 44.88479 | 38.32973 |
|                      |                    | 50   | 80.1764  | 95.93443 | 86.45211 | 95.38073 | 87.85089 | 101.9469 |
|                      |                    | 200  | 186.0189 | 193.0916 | 168.2408 | 179.9639 | 178.9686 | 174.7772 |
|                      |                    | 400  | 508.3358 | 535.3861 | 511.5849 | 500.8353 | 474.7637 | 525.5451 |
|                      |                    | 600  | 857.1599 | 853.7033 | 801.2955 | 787.0055 | 821.846  | 856.7291 |
|                      |                    | 1000 | 906.4098 | 923.3419 | 846.8904 | 877.9819 | 819.9585 | 825.9586 |
|                      |                    | 2000 | 1482.494 | 1336.604 | 1465.093 | 1278.155 | 1328.858 | 1397.092 |
|                      | Prediction<br>Set  | 2500 | 1887.973 | 1882.352 | 1890.164 | 1842.618 | 2052.235 | 1998.124 |
|                      |                    | 100  | 113.5638 | 106.7648 | 115.4386 | 138.1908 | 109.8986 | 118.2839 |
|                      |                    | 800  | 858.7499 | 992.3203 | 897.0624 | 915.8373 | 872.6544 | 869.7044 |
|                      |                    | 1500 | 1032.36  | 1153.979 | 1095.444 | 1121.373 | 1183.873 | 1137.91  |
| Sr I<br>&<br>0.1 MPa | Calibration<br>Set | 20   | 27.86257 | 26.83278 | 33.21546 | 29.56875 | 27.9381  | 28.70925 |
|                      |                    | 50   | 117.7179 | 115.3744 | 126.7541 | 119.6643 | 118.2276 | 115.287  |
|                      |                    | 200  | 528.5288 | 546.5085 | 488.6159 | 564.3507 | 551.3443 | 536.1561 |
|                      |                    | 400  | 1094.635 | 1062.427 | 1065.835 | 1096.472 | 1019.767 | 1040.318 |
|                      |                    | 600  | 2787.572 | 2693.097 | 2580.588 | 2633.835 | 2786.965 | 2631.62  |
|                      |                    | 1000 | 3958.568 | 4078.535 | 4185.177 | 4187.883 | 4142.538 | 4119.077 |
|                      |                    | 2000 | 6806.793 | 7231.333 | 7236.54  | 7130.818 | 7015.364 | 7153.267 |
|                      | Prediction<br>Set  | 2500 | 8836.364 | 8878.169 | 8563.285 | 8882.581 | 8684.598 | 9164.229 |
|                      |                    | 100  | 275.1065 | 223.1327 | 263.2173 | 271.1258 | 261.4261 | 245.3807 |
|                      |                    | 800  | 3483.692 | 3483.397 | 3556.849 | 3764.395 | 3471.102 | 3738.775 |
|                      |                    | 1500 | 5476.646 | 5592.744 | 5498.391 | 5504.343 | 5599.19  | 5725.444 |
|                      | Calibration        | 20   | 46.48862 | 36.33579 | 48.82379 | 46.54736 | 41.38566 | 36.36484 |

|                     |                 |          |          |          |          |          |          |          |
|---------------------|-----------------|----------|----------|----------|----------|----------|----------|----------|
| Sr I<br>&<br>5 MPa  | Set             | 50       | 111.9671 | 104.9949 | 118.4086 | 106.9967 | 108.5109 | 114.4407 |
|                     |                 | 200      | 518.6359 | 496.5102 | 469.0274 | 482.1227 | 465.6779 | 491.7982 |
|                     |                 | 400      | 1236.294 | 1322.965 | 1389.696 | 1271.107 | 1396.082 | 1310.393 |
|                     |                 | 600      | 2434.916 | 2577.481 | 2652.397 | 2649.03  | 2753.783 | 2610.93  |
|                     |                 | 1000     | 3862.885 | 3835.001 | 3619.306 | 3913.257 | 3859.722 | 3918.704 |
|                     |                 | 2000     | 7024.817 | 7556.78  | 7202.488 | 7483.033 | 7269.68  | 6970.983 |
|                     |                 | 2500     | 8488.127 | 8456.828 | 8509.831 | 8181.534 | 8476.221 | 8681.373 |
|                     | Prediction Set  | 100      | 244.6484 | 245.568  | 228.6322 | 259.5607 | 230.2142 | 262.747  |
|                     |                 | 800      | 3308.929 | 3265.036 | 3433.499 | 3222.871 | 3252.564 | 3322.5   |
| 1500                |                 | 4860.046 | 4903.324 | 4926.026 | 4861.036 | 4944.201 | 4907.293 |          |
| Sr I<br>&<br>10 MPa | Calibration Set | 20       | 40.34077 | 51.07428 | 41.20048 | 45.22613 | 36.20606 | 46.59682 |
|                     |                 | 50       | 107.9541 | 112.9284 | 112.893  | 97.23641 | 112.5757 | 102.402  |
|                     |                 | 200      | 470.3556 | 472.4479 | 437.8072 | 460.0463 | 481.8124 | 488.9488 |
|                     |                 | 400      | 1381.908 | 1311.429 | 1407.751 | 1383.711 | 1294.014 | 1299.115 |
|                     |                 | 600      | 2699.903 | 2772.266 | 2579.441 | 2629.865 | 2702.259 | 2746.154 |
|                     |                 | 1000     | 3898.394 | 3639.295 | 3925.486 | 3947.688 | 3786.836 | 3818.714 |
|                     |                 | 2000     | 6895.955 | 7261.094 | 6797.401 | 7133.429 | 6958.317 | 7263.846 |
|                     |                 | 2500     | 7998.503 | 7804.719 | 8221.393 | 7943.33  | 7735.687 | 8265.722 |
|                     | Prediction Set  | 100      | 240.8895 | 235.3337 | 264.4473 | 258.878  | 242.1282 | 234.4202 |
|                     |                 | 800      | 3107.743 | 3088.35  | 3051.809 | 2872.454 | 3092.537 | 2948.174 |
|                     |                 | 1500     | 5385.766 | 5319.829 | 5600.139 | 5423.204 | 5458.296 | 5733.028 |
| Sr I<br>&           | Calibration Set | 20       | 46.5803  | 51.69212 | 39.17468 | 38.86789 | 44.98191 | 45.6358  |
|                     |                 | 50       | 118.8906 | 131.3129 | 114.4696 | 105.3554 | 101.6095 | 106.5163 |
|                     |                 | 200      | 457.5631 | 496.8187 | 514.0613 | 481.0715 | 446.6575 | 487.5692 |
|                     |                 | 400      | 1314.674 | 1298.317 | 1310.165 | 1304.067 | 1270.316 | 1280.235 |

|                     |                 |      |          |          |          |          |          |          |
|---------------------|-----------------|------|----------|----------|----------|----------|----------|----------|
| 20 MPa              |                 | 600  | 2620.096 | 2633.595 | 2646.391 | 2725.335 | 2624.02  | 2728.606 |
|                     |                 | 1000 | 3819.508 | 3860.358 | 3792.721 | 3763.839 | 3813.335 | 3749.044 |
|                     |                 | 2000 | 6405.266 | 6690.687 | 6526.414 | 6429.339 | 6435.137 | 7044.058 |
|                     |                 | 2500 | 8062.923 | 8191.161 | 8078.864 | 8436.497 | 8556.459 | 8744.51  |
|                     | Prediction Set  | 100  | 228.063  | 213.6941 | 229.2821 | 218.6941 | 214.4949 | 235.2405 |
|                     |                 | 800  | 3215.162 | 3124.73  | 3084.512 | 3063.023 | 3075.43  | 2993.594 |
|                     |                 | 1500 | 5162.154 | 5283.827 | 5151.383 | 5188.513 | 5353.806 | 5187.484 |
| Sr I<br>&<br>30 MPa | Calibration Set | 20   | 42.44703 | 43.44278 | 40.38031 | 50.73071 | 55.07008 | 48.23243 |
|                     |                 | 50   | 101.4485 | 109.7367 | 105.7271 | 113.6501 | 115.2571 | 96.34519 |
|                     |                 | 200  | 440.6688 | 441.8849 | 470.5447 | 446.3977 | 453.5999 | 435.1686 |
|                     |                 | 400  | 1292.891 | 1243.652 | 1257.849 | 1245.994 | 1183.868 | 1262.713 |
|                     |                 | 600  | 2517.853 | 2585.819 | 2623.398 | 2592.439 | 2352.106 | 2643.718 |
|                     |                 | 1000 | 3579.707 | 3647.255 | 3662.723 | 3677.533 | 3698.323 | 3649.982 |
|                     |                 | 2000 | 6632.291 | 6447.962 | 6795.462 | 6693.939 | 6411.726 | 6572.059 |
|                     |                 | 2500 | 8098.755 | 8289.197 | 8080.995 | 8078.568 | 8490.134 | 7935.525 |
|                     | Prediction Set  | 100  | 213.4394 | 221.1251 | 249.2995 | 231.3704 | 237.9455 | 229.554  |
|                     |                 | 800  | 2816.96  | 2765.681 | 2866.588 | 2843.373 | 2839.769 | 2859.125 |
|                     |                 | 1500 | 5260.152 | 5327.406 | 5132.096 | 5234.308 | 5289.833 | 5271.23  |
|                     |                 |      |          |          |          |          |          |          |
|                     |                 |      |          |          |          |          |          |          |
| Sr I<br>&<br>40 MPa | Calibration Set | 20   | 37.14189 | 35.69216 | 42.83953 | 36.10324 | 35.70829 | 49.09905 |
|                     |                 | 50   | 97.63236 | 103.0207 | 106.0102 | 96.97937 | 96.05687 | 98.72298 |
|                     |                 | 200  | 441.7887 | 416.1874 | 437.3688 | 407.1958 | 428.2179 | 435.5552 |
|                     |                 | 400  | 1234.95  | 1185.921 | 1141.888 | 1152.156 | 1203.714 | 1149.07  |
|                     |                 | 600  | 2518.863 | 2599.329 | 2442.434 | 2430.56  | 2394.429 | 2504.266 |
|                     |                 | 1000 | 3574.932 | 3620.269 | 3431.327 | 3729.305 | 3547.58  | 3510.546 |
|                     |                 | 2000 | 6503.087 | 6887.322 | 6622.316 | 6755.259 | 6496.798 | 6972.539 |

|                     |                      |                 |          |          |          |          |          |          |          |
|---------------------|----------------------|-----------------|----------|----------|----------|----------|----------|----------|----------|
|                     | Prediction Set       | 2500            | 8593.36  | 8720.247 | 8552.177 | 8325.634 | 8655.109 | 8397.792 |          |
|                     |                      | 100             | 232.4112 | 208.1863 | 214.335  | 200.1807 | 212.0199 | 209.9438 |          |
|                     |                      | 800             | 2851.436 | 2871.138 | 2969.692 | 2831.527 | 2916.608 | 2839.053 |          |
|                     |                      | 1500            | 5091.366 | 5090.256 | 5066.117 | 5106.07  | 4855.115 | 5292.604 |          |
| Sr I<br>&<br>50 MPa | Calibration Set      | 20              | 42.67509 | 42.36552 | 40.85819 | 35.94955 | 37.29142 | 36.67717 |          |
|                     |                      | 50              | 88.11026 | 105.4865 | 102.4091 | 96.79651 | 111.0385 | 103.5477 |          |
|                     |                      | 200             | 408.5271 | 429.6068 | 415.4842 | 427.6869 | 420.9433 | 408.1766 |          |
|                     |                      | 400             | 1136.183 | 1165.526 | 1194.377 | 1026.883 | 1089.278 | 1217.677 |          |
|                     |                      | 600             | 2394.533 | 2260.468 | 2397.528 | 2387.48  | 2437.773 | 2330.017 |          |
|                     |                      | 1000            | 3246.913 | 3310.177 | 3053.533 | 3347.113 | 3269.305 | 3051.073 |          |
|                     |                      | 2000            | 6481.97  | 6062.229 | 6269.588 | 5743.323 | 6049.56  | 6265.078 |          |
|                     | 2500                 | 8286.736        | 8334.588 | 8346.926 | 8154.33  | 8543.207 | 8466.448 |          |          |
|                     | Prediction Set       | 100             | 194.5255 | 199.3982 | 201.3216 | 212.9716 | 211.3591 | 213.2545 |          |
|                     |                      | 800             | 2906.647 | 3031.01  | 2948.154 | 2981.356 | 2896.26  | 2928.672 |          |
|                     |                      | 1500            | 4485.87  | 4680.479 | 4598.548 | 4652.388 | 4852.734 | 4567.362 |          |
|                     | CaOH<br>&<br>0.1 MPa | Calibration Set | 20       | 21.00269 | 19.52805 | 19.44661 | 21.53369 | 21.88119 | 17.76221 |
|                     |                      |                 | 50       | 40.26679 | 37.53911 | 44.747   | 46.05947 | 43.97664 | 39.05375 |
| 200                 |                      |                 | 148.945  | 155.1614 | 157.1569 | 150.2264 | 153.9614 | 147.7779 |          |
| 400                 |                      |                 | 296.2549 | 268.8232 | 272.6581 | 281.3672 | 259.7656 | 270.06   |          |
| 600                 |                      |                 | 417.9963 | 438.4876 | 441.4103 | 456.3763 | 462.6681 | 465.3429 |          |
| 1000                |                      |                 | 651.9136 | 661.3515 | 708.9546 | 665.0224 | 688.8905 | 639.8691 |          |
| 2000                |                      |                 | 1430.583 | 1392.795 | 1405.17  | 1386.518 | 1389.681 | 1420.915 |          |
| 2500                |                      | 1820.641        | 1712.888 | 1685.688 | 1795.094 | 1754.795 | 1711.016 |          |          |
| Prediction Set      |                      | 100             | 74.22057 | 71.72937 | 70.46044 | 70.93931 | 65.30996 | 64.62873 |          |
|                     |                      | 800             | 587.3998 | 624.7985 | 623.5674 | 582.4952 | 599.5272 | 609.264  |          |

|                                  |                    |          |          |          |          |          |          |          |
|----------------------------------|--------------------|----------|----------|----------|----------|----------|----------|----------|
|                                  |                    | 1500     | 998.6166 | 987.2388 | 983.1591 | 994.0509 | 1004.578 | 993.8787 |
| <b>CaOH<br/>&amp;<br/>5 MPa</b>  | Calibration<br>Set | 20       | 34.66088 | 30.06959 | 26.92764 | 25.99404 | 24.39259 | 28.42447 |
|                                  |                    | 50       | 40.00741 | 40.62175 | 40.65655 | 39.5363  | 38.55682 | 45.36574 |
|                                  |                    | 200      | 147.2165 | 156.4918 | 153.1001 | 138.6321 | 146.4784 | 153.7401 |
|                                  |                    | 400      | 236.9747 | 225.5662 | 234.2734 | 240.4515 | 218.577  | 231.9223 |
|                                  |                    | 600      | 448.2607 | 443.1236 | 447.5068 | 465.4029 | 446.7518 | 451.3095 |
|                                  |                    | 1000     | 715.8959 | 739.0497 | 675.075  | 687.7308 | 715.307  | 715.8006 |
|                                  |                    | 2000     | 1394.955 | 1371.118 | 1350.641 | 1357.151 | 1362.77  | 1381.91  |
|                                  |                    | 2500     | 1664.689 | 1755.257 | 1643.682 | 1694.429 | 1696.761 | 1679.925 |
|                                  | Prediction<br>Set  | 100      | 65.09717 | 66.8785  | 68.02122 | 73.53105 | 73.10604 | 80.29927 |
|                                  |                    | 800      | 557.1663 | 609.9075 | 543.8813 | 580.6245 | 568.7568 | 568.1693 |
| 1500                             |                    | 962.2867 | 963.7021 | 1038.931 | 971.3661 | 983.7903 | 996.1624 |          |
| <b>CaOH<br/>&amp;<br/>10 MPa</b> | Calibration<br>Set | 20       | 26.92973 | 31.41811 | 27.74505 | 27.96124 | 29.24088 | 30.56187 |
|                                  |                    | 50       | 48.37021 | 48.89616 | 45.99867 | 44.66954 | 41.82634 | 50.83592 |
|                                  |                    | 200      | 150.2508 | 155.3815 | 151.9007 | 150.5212 | 142.2582 | 153.3961 |
|                                  |                    | 400      | 245.681  | 233.9854 | 229.7873 | 230.369  | 212.4184 | 252.7646 |
|                                  |                    | 600      | 434.9835 | 430.1494 | 443.7578 | 446.3133 | 464.718  | 443.6725 |
|                                  |                    | 1000     | 703.4463 | 667.5186 | 687.5299 | 688.0872 | 676.1957 | 664.8514 |
|                                  |                    | 2000     | 1375.012 | 1318.883 | 1352.716 | 1353.873 | 1331.84  | 1363.502 |
|                                  |                    | 2500     | 1668.685 | 1709.567 | 1703.98  | 1654.946 | 1697.639 | 1663.387 |
|                                  | Prediction<br>Set  | 100      | 74.34917 | 95.43121 | 78.29346 | 78.3647  | 67.25454 | 73.58522 |
|                                  |                    | 800      | 575.4827 | 548.7775 | 561.2184 | 551.6567 | 591.5532 | 577.0841 |
| 1500                             |                    | 1026.02  | 1084.127 | 1038.877 | 968.6298 | 982.1061 | 1058.855 |          |
| <b>CaOH</b>                      | Calibration<br>Set | 20       | 25.62269 | 32.94461 | 28.10934 | 29.95756 | 28.63146 | 26.04209 |
|                                  |                    | 50       | 51.68497 | 49.76192 | 46.70825 | 43.32302 | 48.19567 | 49.8689  |

|                     |                 |      |          |          |          |          |          |          |
|---------------------|-----------------|------|----------|----------|----------|----------|----------|----------|
| &<br>20 MPa         |                 | 200  | 157.4181 | 166.9094 | 160.3754 | 149.5396 | 146.3505 | 156.4089 |
|                     |                 | 400  | 215.9555 | 239.9996 | 253.6162 | 241.5261 | 233.1435 | 230.2564 |
|                     |                 | 600  | 434.5987 | 450.6162 | 424.8372 | 439.8615 | 429.445  | 417.5544 |
|                     |                 | 1000 | 681.1003 | 695.1241 | 675.0396 | 695.5289 | 669.8266 | 709.1319 |
|                     |                 | 2000 | 1262.266 | 1238.019 | 1293.49  | 1325.361 | 1287.79  | 1208.932 |
|                     |                 | 2500 | 1728.935 | 1732.302 | 1657.741 | 1633.343 | 1699.846 | 1607.554 |
|                     | Prediction Set  | 100  | 82.75725 | 69.90098 | 81.91716 | 70.43191 | 75.36571 | 79.10502 |
|                     |                 | 800  | 556.6808 | 563.8423 | 578.4855 | 575.0638 | 575.7619 | 556.5349 |
|                     |                 | 1500 | 1060.331 | 1047.403 | 1037.421 | 1010.622 | 1016.027 | 1011.895 |
| CaOH<br>&<br>30 MPa | Calibration Set | 20   | 24.68539 | 28.3682  | 33.95234 | 26.96038 | 28.50807 | 28.171   |
|                     |                 | 50   | 50.14016 | 53.52839 | 49.33033 | 45.94484 | 50.2822  | 41.74626 |
|                     |                 | 200  | 163.3612 | 149.4812 | 152.7637 | 147.9991 | 166.4183 | 162.7777 |
|                     |                 | 400  | 247.5298 | 233.0957 | 222.8452 | 234.2303 | 224.2685 | 231.1955 |
|                     |                 | 600  | 478.1669 | 463.7006 | 457.3354 | 469.6942 | 445.5063 | 454.0159 |
|                     |                 | 1000 | 699.2466 | 635.9779 | 681.0714 | 696.1517 | 702.8948 | 733.5411 |
|                     |                 | 2000 | 1224.853 | 1260.37  | 1228.635 | 1241.018 | 1247.267 | 1209.269 |
|                     |                 | 2500 | 1600.389 | 1642.374 | 1609.44  | 1686.078 | 1698.47  | 1525.428 |
|                     | Prediction Set  | 100  | 71.02532 | 71.92746 | 70.04602 | 75.91419 | 77.48098 | 72.0784  |
|                     |                 | 800  | 548.2656 | 549.1447 | 583.2266 | 543.0577 | 541.4293 | 530.2091 |
|                     |                 | 1500 | 1056.5   | 999.7832 | 1015.02  | 992.5774 | 1043.947 | 972.8128 |
|                     |                 |      |          |          |          |          |          |          |
| CaOH<br>&           | Calibration Set | 20   | 27.76094 | 30.47187 | 26.83148 | 26.11508 | 32.766   | 24.07731 |
|                     |                 | 50   | 52.79455 | 47.33617 | 49.41627 | 49.89065 | 44.60296 | 53.74314 |
|                     |                 | 200  | 172.9586 | 156.5551 | 150.5298 | 165.4009 | 176.1771 | 156.5894 |
|                     |                 | 400  | 213.295  | 228.2785 | 247.925  | 225.1049 | 231.4758 | 220.819  |
|                     |                 | 600  | 459.7354 | 445.164  | 463.2541 | 453.0455 | 459.6373 | 474.3833 |

|                     |                      |                 |          |          |          |          |          |          |
|---------------------|----------------------|-----------------|----------|----------|----------|----------|----------|----------|
| 40 MPa              |                      | 1000            | 714.4658 | 691.2201 | 698.1056 | 692.8671 | 668.3989 | 683.7613 |
|                     |                      | 2000            | 1406.485 | 1420.113 | 1350.871 | 1333.609 | 1379.526 | 1287.418 |
|                     |                      | 2500            | 1674.156 | 1657.799 | 1665.475 | 1635.166 | 1620.975 | 1657.301 |
|                     | Prediction Set       | 100             | 86.79482 | 80.08275 | 86.72175 | 76.52906 | 83.65297 | 78.01127 |
|                     |                      | 800             | 517.9949 | 529.3699 | 570.6331 | 578.309  | 559.7086 | 558.3036 |
|                     |                      | 1500            | 964.2137 | 1010.169 | 1006.221 | 1010.93  | 967.5689 | 992.3062 |
| CaOH<br>&<br>50 MPa | Calibration Set      | 20              | 28.30746 | 31.49918 | 31.57479 | 31.23384 | 38.74948 | 30.37057 |
|                     |                      | 50              | 59.25007 | 54.35627 | 49.49549 | 49.69952 | 45.73505 | 47.96346 |
|                     |                      | 200             | 148.7298 | 148.342  | 155.6765 | 162.2707 | 161.896  | 168.2342 |
|                     |                      | 400             | 214.3105 | 230.7976 | 227.1034 | 223.708  | 245.3031 | 236.1337 |
|                     |                      | 600             | 437.2535 | 429.9229 | 443.1411 | 438.6807 | 430.7268 | 437.4127 |
|                     |                      | 1000            | 671.0099 | 686.9647 | 665.8421 | 681.5481 | 720.6045 | 686.613  |
|                     |                      | 2000            | 1306.345 | 1284.946 | 1328.618 | 1354.658 | 1340.725 | 1303.46  |
|                     |                      | 2500            | 1748.01  | 1807.284 | 1777.928 | 1770.576 | 1785.709 | 1776.046 |
|                     | Prediction Set       | 100             | 91.93071 | 91.27236 | 100.7707 | 80.92916 | 89.89996 | 87.88518 |
|                     |                      | 800             | 626.8844 | 644.779  | 609.8517 | 601.5431 | 612.1309 | 610.9787 |
|                     |                      | 1500            | 1006.646 | 1001.645 | 980.8911 | 1041.967 | 1000.631 | 996.0043 |
|                     | SrOH<br>&<br>0.1 MPa | Calibration Set | 20       | 13.9961  | 10.80146 | 14.44847 | 10.71789 | 14.18265 |
| 50                  |                      |                 | 24.18959 | 22.18994 | 26.28257 | 31.40315 | 20.92884 | 19.47522 |
| 200                 |                      |                 | 70.77497 | 69.32183 | 69.3097  | 72.34944 | 77.69207 | 86.94737 |
| 400                 |                      |                 | 145.5375 | 139.5064 | 157.6147 | 148.6272 | 155.0207 | 148.0686 |
| 600                 |                      |                 | 212.6813 | 218.7068 | 206.4013 | 229.5318 | 210.8314 | 234.2745 |
| 1000                |                      |                 | 293.3396 | 324.218  | 362.063  | 317.213  | 339.5319 | 295.8232 |
| 2000                |                      |                 | 669.3457 | 629.2755 | 657.5749 | 682.7409 | 666.2009 | 675.3791 |
| 2500                |                      |                 | 836.4359 | 809.6553 | 813.5838 | 850.7025 | 805.0529 | 774.6426 |

|                    |                     |                 |          |          |          |          |          |          |          |
|--------------------|---------------------|-----------------|----------|----------|----------|----------|----------|----------|----------|
|                    | Prediction Set      | 100             | 41.83267 | 41.63069 | 38.78255 | 40.7839  | 32.53216 | 36.31066 |          |
|                    |                     | 800             | 285.2298 | 293.9809 | 296.3962 | 304.2617 | 281.0049 | 257.3304 |          |
|                    |                     | 1500            | 481.1657 | 457.6527 | 464.6202 | 453.4504 | 452.8626 | 460.1954 |          |
| SrOH<br>&<br>5 MPa | Calibration Set     | 20              | 16.33414 | 17.05783 | 17.79625 | 16.88354 | 14.27442 | 15.49304 |          |
|                    |                     | 50              | 22.76442 | 27.13398 | 30.06378 | 25.12627 | 23.81182 | 20.02808 |          |
|                    |                     | 200             | 84.75316 | 89.57894 | 72.66667 | 71.33569 | 76.77766 | 75.08817 |          |
|                    |                     | 400             | 104.6187 | 134.5838 | 121.8281 | 109.2026 | 108.1907 | 110.5852 |          |
|                    |                     | 600             | 226.6354 | 233.9273 | 228.983  | 211.7862 | 221.8039 | 208.2157 |          |
|                    |                     | 1000            | 354.1934 | 337.0711 | 373.9879 | 341.1649 | 324.2977 | 337.3609 |          |
|                    |                     | 2000            | 684.4173 | 675.9289 | 655.5741 | 654.9197 | 660.7005 | 627.6123 |          |
|                    | Prediction Set      | 2500            | 778.762  | 777.8074 | 820.0084 | 802.4962 | 811.0383 | 780.6157 |          |
|                    |                     | 100             | 32.22574 | 42.14722 | 39.52742 | 44.44384 | 43.45476 | 48.07485 |          |
|                    |                     | 800             | 266.561  | 292.1994 | 255.7364 | 252.0354 | 240.447  | 318.1765 |          |
|                    |                     |                 | 1500     | 478.2368 | 465.0422 | 503.207  | 464.0006 | 480.3571 | 458.3122 |
|                    | SrOH<br>&<br>10 MPa | Calibration Set | 20       | 12.06019 | 15.52042 | 19.32741 | 15.48274 | 16.06906 | 17.77586 |
|                    |                     |                 | 50       | 24.32402 | 27.42065 | 26.36462 | 29.59303 | 23.47124 | 22.09914 |
| 200                |                     |                 | 76.68931 | 71.09408 | 79.02275 | 79.8     | 79.57108 | 80.34006 |          |
| 400                |                     |                 | 117.8934 | 104.1994 | 118.7809 | 107.487  | 108.4305 | 112.671  |          |
| 600                |                     |                 | 227.3079 | 219.4507 | 215.2855 | 218.7616 | 238.4974 | 233.6331 |          |
| 1000               |                     |                 | 315.0653 | 314.5719 | 311.3436 | 333.7189 | 322.3128 | 332.104  |          |
| 2000               |                     |                 | 683.8744 | 637.5854 | 628.5461 | 651.4971 | 619.4418 | 652.5025 |          |
| Prediction Set     |                     | 2500            | 771.1325 | 786.4328 | 781.8577 | 753.2256 | 817.7428 | 788.4457 |          |
|                    |                     | 100             | 50.03281 | 48.07072 | 46.51377 | 41.24473 | 38.08059 | 36.61219 |          |
|                    |                     | 800             | 259.4817 | 246.8402 | 272.8441 | 279.909  | 266.709  | 261.1826 |          |
|                    |                     |                 | 1500     | 469.779  | 513.5458 | 513.6755 | 455.3349 | 485.7292 | 516.3047 |

|                     |                    |          |          |          |          |          |          |          |
|---------------------|--------------------|----------|----------|----------|----------|----------|----------|----------|
| SrOH<br>&<br>20 MPa | Calibration<br>Set | 20       | 13.72334 | 15.25381 | 14.67151 | 20.29299 | 17.60694 | 18.4448  |
|                     |                    | 50       | 26.52109 | 23.46354 | 24.40594 | 23.89776 | 21.30889 | 30.47095 |
|                     |                    | 200      | 73.58311 | 86.92616 | 89.57818 | 78.73764 | 85.06148 | 85.87054 |
|                     |                    | 400      | 116.2645 | 120.5795 | 117.0607 | 137.3075 | 108.8164 | 120.5138 |
|                     |                    | 600      | 240.9816 | 200.5326 | 202.4604 | 218.8546 | 210.9607 | 221.8465 |
|                     |                    | 1000     | 314.5661 | 336.6994 | 350.7365 | 318.8684 | 308.4051 | 332.9716 |
|                     |                    | 2000     | 587.9519 | 596.9183 | 599.7599 | 669.41   | 639.8621 | 590.957  |
|                     | 2500               | 790.9989 | 750.494  | 811.77   | 757.3143 | 820.0861 | 774.733  |          |
|                     | Prediction<br>Set  | 100      | 38.33367 | 43.7932  | 37.90875 | 44.32041 | 37.67538 | 42.47054 |
|                     |                    | 800      | 252.0702 | 246.7731 | 250.3444 | 269.6199 | 241.8001 | 271.6318 |
| 1500                |                    | 502.3261 | 480.5403 | 454.6315 | 452.3891 | 470.3247 | 492.8471 |          |
| SrOH<br>&<br>30 MPa | Calibration<br>Set | 20       | 14.58785 | 18.74914 | 16.16827 | 17.00104 | 17.63999 | 15.22061 |
|                     |                    | 50       | 27.44403 | 26.81919 | 27.30313 | 31.0609  | 27.98513 | 25.2681  |
|                     |                    | 200      | 81.21125 | 87.52456 | 79.86749 | 76.95555 | 75.74839 | 77.83552 |
|                     |                    | 400      | 115.486  | 99.59496 | 108.1448 | 105.4952 | 116.9752 | 109.7038 |
|                     |                    | 600      | 213.0583 | 202.9122 | 210.326  | 227.4368 | 198.8237 | 209.0254 |
|                     |                    | 1000     | 329.0032 | 331.7612 | 299.6533 | 325.6184 | 315.4099 | 358.9238 |
|                     |                    | 2000     | 601.5675 | 614.6563 | 581.6025 | 618.9681 | 608.1832 | 595.0548 |
|                     | 2500               | 703.8213 | 737.358  | 749.7386 | 843.4014 | 791.459  | 689.7556 |          |
|                     | Prediction<br>Set  | 100      | 43.89989 | 37.53417 | 34.37388 | 39.00114 | 38.08135 | 39.18133 |
|                     |                    | 800      | 243.876  | 248.6821 | 267.8878 | 264.9984 | 236.77   | 231.6645 |
| 1500                |                    | 451.369  | 485.1619 | 515.8713 | 476.7906 | 484.3594 | 466.6558 |          |
| SrOH                | Calibration<br>Set | 20       | 18.36831 | 12.09694 | 16.98374 | 14.09924 | 17.91112 | 17.82226 |
|                     |                    | 50       | 28.78824 | 32.59755 | 28.34013 | 33.25444 | 28.3615  | 27.8867  |
|                     |                    | 200      | 78.41996 | 87.33869 | 90.33931 | 81.8863  | 80.44234 | 72.91068 |

|                     |                 |      |          |          |          |          |          |          |
|---------------------|-----------------|------|----------|----------|----------|----------|----------|----------|
| &<br>40 MPa         |                 | 400  | 126.0176 | 109.2091 | 105.4327 | 116.8997 | 111.3266 | 109.1789 |
|                     |                 | 600  | 198.9179 | 238.7304 | 220.8122 | 207.0519 | 216.2409 | 216.636  |
|                     |                 | 1000 | 306.2392 | 335.2293 | 308.3651 | 341.5131 | 301.3794 | 310.3537 |
|                     |                 | 2000 | 646.4278 | 672.264  | 646.3145 | 666.0921 | 692.8541 | 618.082  |
|                     |                 | 2500 | 766.228  | 770.1176 | 797.8917 | 742.1101 | 771.5595 | 750.3843 |
|                     | Prediction Set  | 100  | 46.56149 | 46.05004 | 44.48697 | 38.71604 | 43.02664 | 46.73881 |
|                     |                 | 800  | 240.4492 | 235.9088 | 270.689  | 248.9782 | 253.1577 | 256.0321 |
|                     |                 | 1500 | 443.4969 | 490.1997 | 498.3896 | 485.503  | 458.5025 | 487.2185 |
| SrOH<br>&<br>50 MPa | Calibration Set | 20   | 17.67876 | 20.07582 | 15.53299 | 15.06017 | 17.54958 | 16.7894  |
|                     |                 | 50   | 29.71652 | 27.86671 | 28.57431 | 27.68076 | 28.01211 | 30.50113 |
|                     |                 | 200  | 72.63104 | 72.20164 | 78.95441 | 85.79872 | 78.56612 | 79.81541 |
|                     |                 | 400  | 115.015  | 130.2768 | 101.0195 | 122.2894 | 108.353  | 102.4993 |
|                     |                 | 600  | 194.7228 | 201.3789 | 217.4897 | 214.2641 | 197.5446 | 206.3114 |
|                     |                 | 1000 | 308.3062 | 356.1356 | 328.1096 | 316.2456 | 316.7781 | 329.2017 |
|                     |                 | 2000 | 615.4364 | 619.2777 | 659.6721 | 598.3343 | 626.9827 | 605.9794 |
|                     |                 | 2500 | 793.0992 | 830.3481 | 781.8492 | 792.5616 | 796.124  | 833.3137 |
|                     | Prediction Set  | 100  | 48.46706 | 42.53327 | 41.86504 | 50.90973 | 39.17787 | 46.5602  |
|                     |                 | 800  | 284.2743 | 309.0111 | 278.0837 | 282.6427 | 280.0391 | 287.5823 |
|                     |                 | 1500 | 491.6832 | 470.5115 | 458.4066 | 513.4858 | 495.4203 | 478.7217 |
